# Supplementary material
Source: publisher site journal article supplement (https://www.dovepress.com/article/270887)
Supplement: Supplementary file 1 [file get_supplementary_file.php]

Supplementary materials

Trimethylamine N-oxide, a Gut Microbiota-dependent Metabolite, is Associated With Frailty in Older Adults with Cardiovascular Disease

Wei He1,2, Yao Luo1, Jun-Peng Liu1, Ning Sun1, Di Guo1, Ling-Ling Cui1, Pei-Pei Zheng1, Si-Min Yao1, Jie-Fu Yang1,2,*, Hua Wang 1,2,*

1Department of Cardiology, Beijing Hospital, National Center of Gerontology, Beijing, People’s Republic of China, 2Chinese Academy of Medical Sciences, Peking Union Medical College, Beijing, People’s Republic of China

***Correspondence Author:** Hua Wang; Jie-Fu Yang, Department of Cardiology, Beijing Hospital, National Center of Gerontology, No.1, Dahua Road, Dongcheng District, Beijing 100730, People’s Republic of China.

Fax: 86-010-581-150-35; Phone: 86-139-1168-0467; +86-136-0129-2259. Email: wanghua2764@bjhmoh.cn; yangjiefu2011@126.com

**Table S1.** Health variables and cut-points for the frailty index

| List of 48 Variables | Cut Point |
| --- | --- |
| Help bathing | Yes=1, No=0 |
| Help dressing | Yes=1, No=0 |
| Help using the toilet | Yes=1, No=0 |
| Help getting in/out of chair | Yes=1, No=0 |
| Help feeding | Yes=1, No=0 |
| Incontinence | Yes=1, No=0 |
| Help shopping | Yes=1, No=0 |
| Help with finances | Yes=1, No=0 |
| Help using transportation | Yes=1, No=0 |
| Help using telephone | Yes=1, No=0 |
| Help managing medications | Yes=1, No=0 |
| Help with housekeeping | Yes=1, No=0 |
| Help preparing meals | Yes=1, No=0 |
| Help washing clothes | Yes=1, No=0 |
| Hypertension | Yes=1, No=0 |
| Coronary heart disease | Yes=1, No=0 |
| Atrial fibrillation | Yes=1, No=0 |
| Congestive heart failure | Yes=1, No=0 |
| Peripheral artery disease | Yes=1, No=0 |
| Chronic Lung disease | Yes=1, No=0 |
| Sleep apnea hypopnea syndrome | Yes=1, No=0 |
| Diabetes | Yes=1, No=0 |
| Thyroid dysfunction | Yes=1, No=0 |
| Peptic ulcer | Yes=1, No=0 |
| Stroke | Yes=1, No=0 |
| Chronic kidney disease | Yes=1, No=0 |
| Osteoarthritis | Yes=1, No=0 |
| Osteoporosis | Yes=1, No=0 |
| Parkinson’s disease | Yes=1, No=0 |
| Cancer | Yes=1, No=0 |
| Depression | Yes=1(GDS-5items≥2), No=0(GDS-5items<2) |
| Anxiety | Yes=1(HADS-A≥8), No=0(HADS-A<8) |
| Feel lonely | Yes=1, No=0 |
| Cognition impairment | MMSE<18 =1; 18≤MMSE<24 =0.5; MMSE≥ 24 =0 |
| Visual impairment | Yes=1, No=0 |
| Hearing impairment | Yes=1, No=0 |
| Chewing impairment | Yes=1, No=0 |
| Fall history | Yes=1, No=0 |
| Chronic constipation | Yes=1, No=0 |
| Chronic pain | Yes=1, No=0 |
| Insomnia | Yes=1(AIS≥6), No=0(AIS<6) |
| Depend on assistive devices | Yes=1, No=0 |
| Take exercise outside | Yes=0, No=1 |
| Body mass index (BMI) (kg/m2) | BMI≤18 or BMI≥28 =1; 25≤BMI<28 =0.5; 18<BMI<25 =0 |
| Calf circumference (cm) | ≤25th percentile =1; 25th to 50th percentiles =0.5; >50th percentile =0 |
| Peak flow (liters/min) |
| Grip strength (kg) |
| 4m-walking speed (m/s) |

GDS-5items, 5-item geriatric depression scale; HADS-A, hospital anxiety and depression scale-anxiety; MMSE, mini-mental state examination; AIS, athens insomnia scale.

## Supplementary Material on Laboratory testing

The 200 μL of each human plasma sample was mixed with 600ul of 100ng/ml internal standard comprised of d9-TMAO in methanol. Protein in the samples was precipitated by vortexing for 5 minutes, and then the supernatant was recovered following centrifugation at 20000×g, 4℃ for 10 minutes. Then 400ul supernatant was mixed with 400ul methanol/water (3:1, v/v). The supernatant was then analyzed by LC-MS.

Separation for TMAO was performed by the I-Class Ultra performance LC system (Waters, Milford, MA, USA). An ACQUITY UPLC BEH amide (2.1 × 100 mm，1.7 μm column, Waters, Milford, MA, USA) was used suited for TMAO retention. The mobile phase consisted of solvent A (0.1% formic acid-water ) and solvent B (0.1% formic acid-acetonitrile/water (19:1 v/v)) with a gradient elution (0-1min, 95%-95% B; 1-4 min, 95-50% B; 4-5 min, 50-50% B; 5-5.1 min, 50-95% B; 5.1-7.0 min, 95-95% B). The flow rate of the mobile phase was 0.3mL/min. The column temperature was maintained at 45°C. A TQ-S Micro (Waters, Milford, MA, USA) mass spectrometer with an ESI source in positive ion mode was used to quantify TMAO. Quantitation was performed by multiple reaction monitoring (MRM) mode to monitor the ion pairs (m/z) of TMAO (76 → 58) and d9-TMAO (85 → 66), respectively. The desolvation temperature and capillary voltage were kept constant and set to 500℃ and 1.5kV, respectively. The system was controlled by Masslynx 4.1 software (Waters, Milford, MA, USA).

**Figure S1A-B.** Receiver operating curve and AUC value plus 95% confidence interval corresponding to regression models with and without plasma TMAO levels


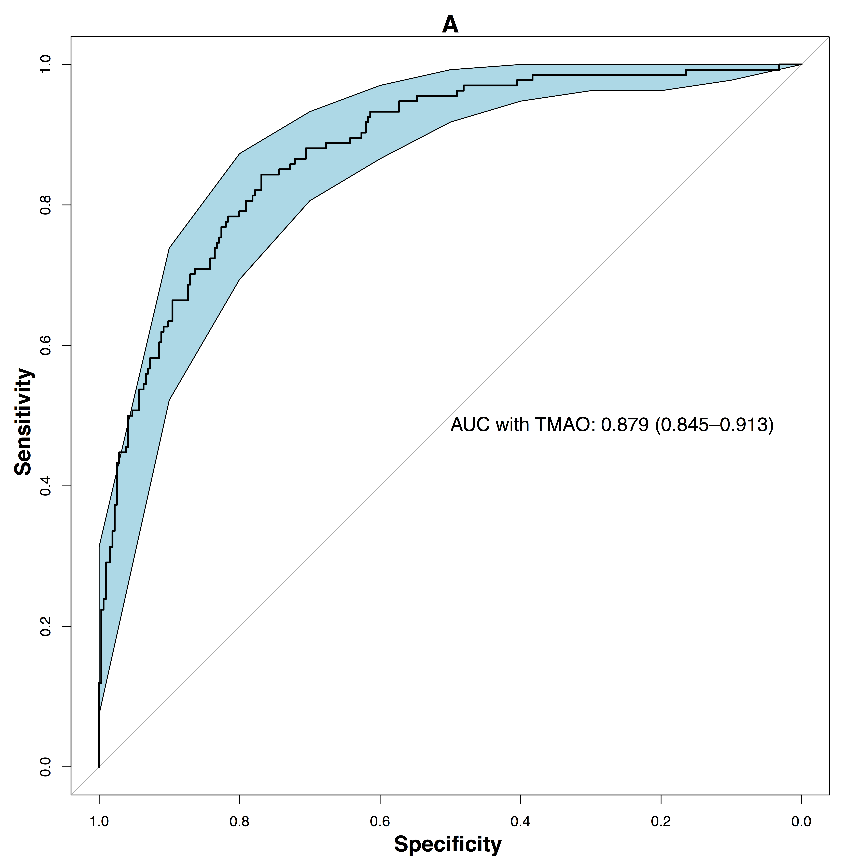

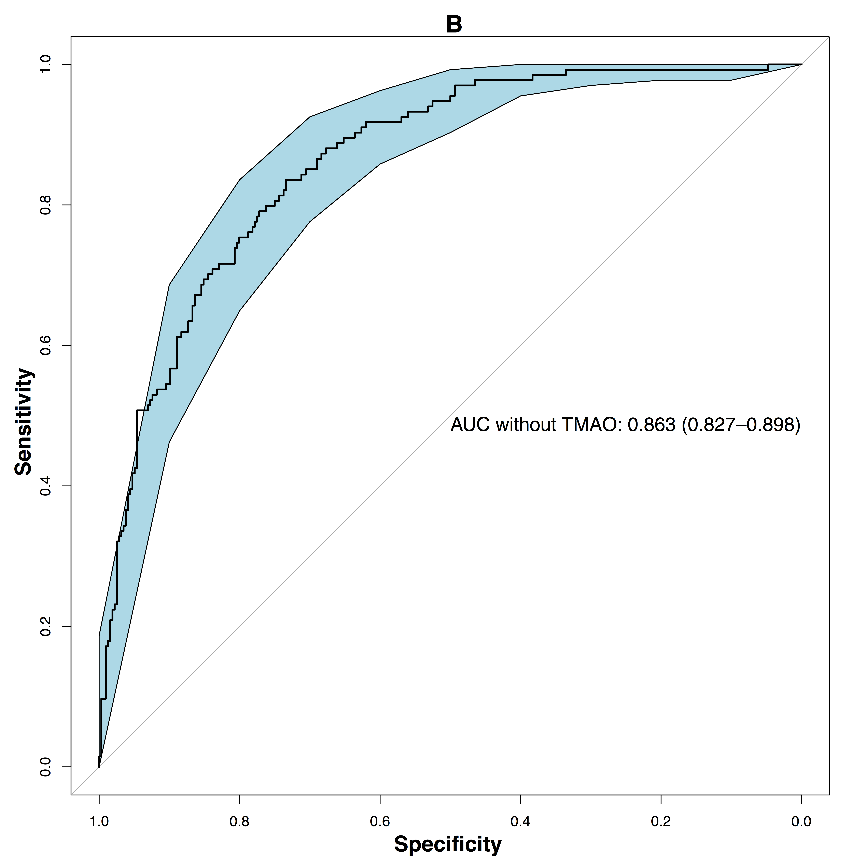


**Abbreviations:** AUC,  area under the curve, TMAO, trimethylamine N-oxide**.**

**Table S2.** Comparison of logistic regression models performance with and without plasma TMAO levels

|  | **Value** | **95% CI** | **P value** |
| --- | --- | --- | --- |
| **AUC without TMAO** | 0.863 | 0.838-0.898 | 0.027a |
| **AUC with TMAO** | 0.879 | 0.845-0.913 |
| **NRI**b | 0.251 | 0.059-0.442 | 0.010 |
| **IDI**c | 0.015 | 0.0003-0.03 | 0.045 |

**Notes:** aP value is from comparing the area under the curve of multivariate models with and without plasma TMAO levels. NRIb and IDIc scores were obtained by adding the plasma TMAO level to the logistic regression model for frailty containing established risk factors.

**Abbreviations:** AUC,  area under the curve, CI, confidence interval, IDI, integrated discrimination improvement, NRI, net reclassification improvement, TMAO, trimethylamine N-oxide.

**Figure S2.** Decision curve analysis for the logistic regression models with and without plasma TMAO levels


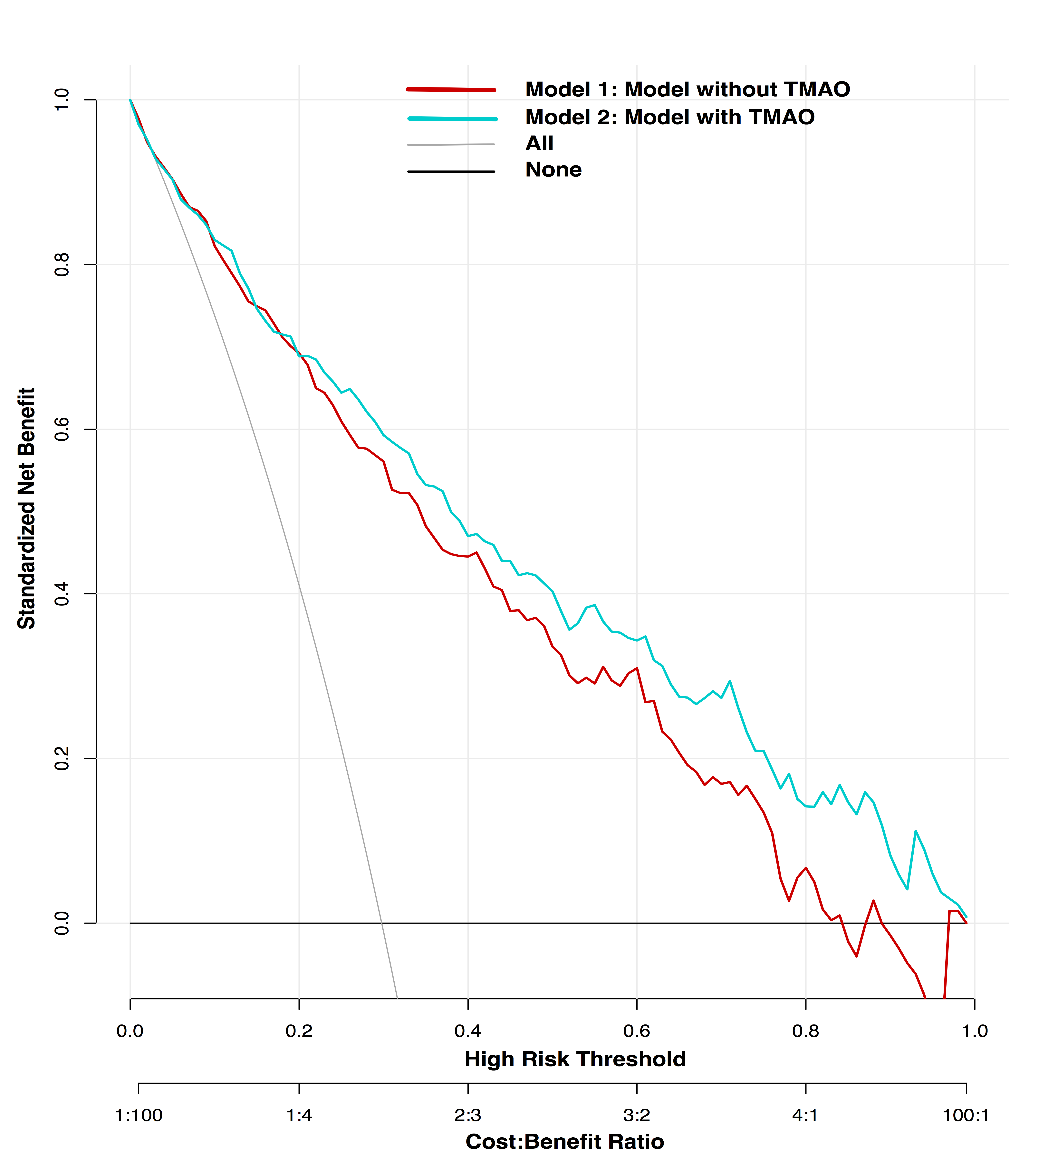


**Abbreviations:** TMAO trimethylamine N-oxide**.**
